# Supplementary material for: Genetic information improves the prediction of major adverse cardiovascular events in the GENEMACOR population
Source: PubMed Central journal article supplement (PMC8201463; doi:10.1590/1678-4685-gmb-2020-0448), 2021-06-11
Supplement: 1415-4757-GMB-44-2-e20200448-s1.pdf [file 1415-4757-GMB-44-2-e20200448-s1.pdf]

## Supplementary Material to “Genetic information improves the prediction of major adverse cardiovascular events in the GENEMACOR population”

**Table S1** - Genetic variants associated with CAD risk in the GENEMACOR population (n=3120).

| SNP ID                       | NEAREST GENE   | ALLELES | CHR | GENOTYPIC OR (95% CI)            | P VALUE | ALLELIC OR (95% CI) | P VALUE | MAF (%) | PUTATIVE FUNCTION* |
|------------------------------|----------------|---------|-----|----------------------------------|---------|---------------------|---------|---------|--------------------|
| rs599839                     | <i>PSRC1</i>   | G>A     | 1   | 1.167 (0.825-1.652) <sup>#</sup> | 0.382   | 1.043 (0.924-1.178) | 0.493   | 21.3    | Lipid metabolism   |
| rs2114580                    | <i>PCSK9</i>   | A>G     | 1   | 1.068 (0.927-1.230) <sup>*</sup> | 0.363   | 1.029 (0.919-1.152) | 0.619   | 26.4    | Lipid metabolism   |
| rs20455                      | <i>KIF6</i>    | T>C     | 6   | 1.153 (0.922-1.441) <sup>*</sup> | 0.211   | 1.059 (0.953-1.178) | 0.287   | 33.0    | Lipid metabolism   |
| rs3798220                    | <i>LPA</i>     | T>C     | 6   | 1.461 (1.200-1.780) <sup>+</sup> | <0.0001 | 2.105 (1.424-3.113) | 0.0001  | 2.0     | Lipid metabolism   |
| rs964184                     | <i>ZPRL1</i>   | C>G     | 11  | 1.109 (0.971-1.266) <sup>+</sup> | 0.126   | 1.107 (0.971-1.262) | 0.129   | 17.6    | Lipid metabolism   |
| rs7412/rs429358 <sup>1</sup> | <i>APOE1</i>   | ε4      | 19  | 1.264 (1.072-1.491) <sup>#</sup> | 0.005   | 1.237 (1.068-1.434) | 0.005   | 13.4    | Lipid metabolism   |
| rs266729                     | <i>ADIPOQ</i>  | C>G     | 3   | 1.137 (1.011-1.280) <sup>*</sup> | 0.033   | 1.137 (1.011-1.280) | 0.033   | 23.4    | Diabetes/Obesity   |
| rs4402960                    | <i>IGF2BP2</i> | G>T     | 3   | 1.111 (0.872-1.414) <sup>*</sup> | 0.394   | 0.999 (0.897-1.113) | 0.987   | 30.6    | Diabetes/Obesity   |
| rs1801282                    | <i>PPARG</i>   | C>G     | 3   | 1.144 (0.960-1.364) <sup>*</sup> | 0.133   | 1.144 (0.960-1.364) | 0.133   | 8.7     | Diabetes/Obesity   |
| rs1326634                    | <i>SLC30A8</i> | T>C     | 9   | 1.159 (0.883-1.520) <sup>#</sup> | 0.287   | 1.060 (0.947-1.188) | 0.311   | 26.0    | Diabetes/Obesity   |
| rs7903146                    | <i>TCF7L2</i>  | C>T     | 10  | 1.011 (0.815-1.254) <sup>#</sup> | 0.919   | 0.999 (0.900-1.109) | 0.987   | 35.1    | Diabetes/Obesity   |
| rs1376251                    | <i>TAS2R50</i> | G>A     | 12  | 1.224 (0.644-2.326) <sup>*</sup> | 0.536   | 1.032 (0.885-1.203) | 0.690   | 12.0    | Diabetes/Obesity   |
| rs8050136                    | <i>FTO</i>     | C>A     | 16  | 1.186 (1.025-1.373) <sup>#</sup> | 0.022   | 1.125 (1.016-1.246) | 0.023   | 39.7    | Diabetes/Obesity   |
| rs17782313                   | <i>MC4R</i>    | T>C     | 18  | 1.387 (1.000-1.925) <sup>*</sup> | 0.049   | 1.071 (0.949-1.209) | 0.268   | 21.7    | Diabetes/Obesity   |
| rs1884613                    | <i>HNF4A</i>   | C>G     | 20  | 0.880 (0.754-1.027) <sup>*</sup> | 0.104   | 0.921 (0.804-1.054) | 0.232   | 16.2    | Diabetes/Obesity   |
| rs699                        | <i>AGT</i>     | T>C     | 1   | 0.954 (0.822-1.109) <sup>#</sup> | 0.542   | 0.991 (0.896-1.096) | 0.860   | 42.7    | Hypertension       |
| rs5186                       | <i>AGT1R</i>   | A>C     | 3   | 1.080 (0.961-1.213) <sup>+</sup> | 0.198   | 1.078 (0.961-1.210) | 0.202   | 24.9    | Hypertension       |
| rs4340                       | <i>ACE</i>     | I>D     | 17  | 1.170 (1.012-1.354) <sup>*</sup> | 0.034   | 1.087 (0.981-1.204) | 0.111   | 38.2    | Hypertension       |
| rs1801131                    | <i>MTHFR</i>   | A>C     | 1   | 1.085 (0.942-1.249) <sup>*</sup> | 0.259   | 1.064 (0.952-1.188) | 0.273   | 28.3    | Oxidation          |
| rs1801133                    | <i>MTHFR</i>   | C>T     | 1   | 1.208 (1.049-1.392) <sup>#</sup> | 0.009   | 1.135 (1.021-1.261) | 0.019   | 33.4    | Oxidation          |
| rs6922269                    | <i>MTHFD1L</i> | G>A     | 6   | 0.969 (0.842-1.116) <sup>#</sup> | 0.666   | 0.988 (0.883-1.104) | 0.828   | 27.3    | Oxidation          |
| rs705379                     | <i>PON1</i>    | C>T     | 7   | 1.088 (0.919-1.288) <sup>#</sup> | 0.325   | 1.044 (0.945-1.154) | 0.393   | 46.8    | Oxidation          |
| rs662                        | <i>PON1</i>    | A>G     | 7   | 1.154 (0.907-1.466) <sup>#</sup> | 0.243   | 1.061 (0.952-1.182) | 0.287   | 30.0    | Oxidation          |
| rs854560                     | <i>PON1</i>    | T>A     | 7   | 1.147 (1.036-1.270) <sup>*</sup> | 0.008   | 1.147 (1.036-1.270) | 0.008   | 40.6    | Oxidation          |
| rs17465637                   | <i>MIA3</i>    | A>C     | 1   | 1.083 (0.970-1.208) <sup>*</sup> | 0.157   | 1.083 (0.970-1.208) | 0.157   | 28.8    | Cellular           |
| rs618675                     | <i>GJA4</i>    | T>C     | 1   | 1.155 (0.807-1.654) <sup>*</sup> | 0.431   | 1.041 (0.918-1.180) | 0.530   | 19.6    | Cellular           |
| rs12190287                   | <i>TCF21</i>   | G>C     | 6   | 1.202 (1.080-1.338) <sup>+</sup> | 0.001   | 1.199 (1.079-1.333) | 0.001   | 33.0    | Cellular           |

| <b>SNP ID</b> | <b>NEAREST GENE</b> | <b>ALLELES</b> | <b>CHR</b> | <b>GENOTYPIC OR (95% CI)</b>     | <b>P VALUE</b> | <b>ALLELIC OR (95% CI)</b> | <b>P VALUE</b> | <b>MAF (%)</b> | <b>PUTATIVE FUNCTION*</b> |
|---------------|---------------------|----------------|------------|----------------------------------|----------------|----------------------------|----------------|----------------|---------------------------|
| rs1332844     | <i>PHACTR1</i>      | C>T            | 6          | 1.183 (1.016-1.379)*             | 0.031          | 1.115 (1.009-1.232)        | 0.033          | 44.5           | Cellular                  |
| rs11556924    | <i>ZC3HC1</i>       | T>C            | 7          | 1.142 (1.028-1.270) <sup>†</sup> | 0.013          | 1.141 (1.027-1.267)        | 0.014          | 34.2           | Cellular                  |
| rs1333049     | <i>CDKN2B-ASI</i>   | G>C            | 9          | 1.134 (1.026-1.253)*             | 0.014          | 1.134 (1.026-1.253)        | 0.014          | 45.6           | Cellular                  |
| rs4977574     | <i>CDKN2B-ASI</i>   | A>G            | 9          | 1.152 (1.041-1.274)*             | 0.006          | 1.152 (1.041-1.274)        | 0.006          | 41.9           | Cellular                  |
| rs17228212    | <i>SMAD3</i>        | T>C            | 15         | 1.121 (0.840-1.496)*             | 0.436          | 1.009 (0.900-1.132)        | 0.873          | 25.5           | Cellular                  |
| rs3825807     | <i>ADAMTS7</i>      | A>G            | 15         | 0.937 (0.847-1.037)*             | 0.207          | 0.937 (0.847-1.037)        | 0.207          | 41.3           | Cellular                  |

SNP – Single Nucleotide Polymorphism; Chr – Chromosome; OR – Odds Ratio; CI – Confidence Interval; MAF – Minor Allele Frequency; \*Additive model; \*Recessive model; #Dominant model; †Allelic model; †Resulting from a Haplotype; Table shows susceptibility loci for CAD, genotypic and allelic ORs and p values for the lead SNP within each locus from GWAS and candidate gene studies. Genotypic ORs are given for additive, recessive, allelic or dominant model. Potential mechanism of action is based on what is already known about the function of the nearby genes. It includes Lipid metabolism, Diabetes/Obesity, Hypertension, Oxidation (genes involved in pro-oxidative status) and Cellular (genes associated to cell cycle, cellular migration and inflammation). \*Themistocles L. Assimes, Robert Roberts. JACC, Vol. 68; (25); 2016.
